# Supplementary material for: Phthalate Exposure and Biomarkers of Oxidation of Nucleic Acids: Results on Couples Attending a Fertility Center
Source: MDPI journal article supplement (doi:10.3390/toxics10020061), 2022-01-29
Supplement: s1 [file s1]

# Supplementary Materials: Phthalate Exposure and Biomarkers of Oxidation of Nucleic Acids: Results on Couples Attending a Fertility Center

Daniela Pigini, Lidia Caporossi, Enrico Paci, Silvia Capanna, Paola Viganò, Alessandra Alteri, Elisa Rabbellotti, Flavia Buonauro, Bruno Papaleo and Giovanna Tranfo

**Table S1.** Multiple linear regression data.

| <b>Women group: Bases and phthalates logarithmic (log 10) transformed</b>                                                                                           |  | <i>p</i>                                |
|---------------------------------------------------------------------------------------------------------------------------------------------------------------------|--|-----------------------------------------|
| oxoGua = 0.633+0.021 (age) – 0.018 (BMI) – 0.306(smoke) + 0.019(alcohol) + 0.325(MnBP)–0.168(MEP)* + 0.083(MBzP) – 0.016(MnOP) + 0.072(DEHP) – 0.086(BisfenoloA)    |  | * <i>p</i> = 0.019                      |
| oxoGuo = 0.376 + 0.006(age) + 0.004(BMI) – 0.157(smoke) – 0.033(alcohol) + 0.123(MnBP) – 0.032(MEP) + 0.029(MBzP) – 0.096(MnOP) + 0.061(DEHP) – 0.038(BisfenoloA)   |  | <i>p</i> > 0.05                         |
| oxodGuo = 0.528 + 0.045(age) – 0.007(BMI) – 0.599(smoke) + 0.047(alcohol) – 0.099(MnBP) + 0.043(MEP) – 0.002(MBzP) – 0.252(MnOP)* + 0.001(DEHP) + 0.111(BisfenoloA) |  | * <i>p</i> = 0.031                      |
| NO2Tyr = 0.983 – 0.007(age) – 0.010(BMI) – 0.425(smoke) + 0.118(alcohol) + 0.127(MnBP) – 0.022(MEP) – 0.069(MBzP) + 0.007(MnOP) + 0.143(DEHP) – 0.061(BisfenoloA)   |  | <i>p</i> > 0.05                         |
| MeCyt = 0.600 – 0.013(age) – 0.009(BMI) + 0.066(smoke) – 0.018(alcohol) + 0.176(MnBP) – 0.047(MEP) + 0.128(MBzP) + 0.021(MnOP) + 0.125(DEHP) – 0.028(BisfenoloA)    |  | <i>p</i> > 0.05                         |
| <b>Men group: Bases and phthalates logarithmic (log 10) transformed</b>                                                                                             |  |                                         |
| oxoGua = 1.293 + 0.021(age) – 0.018(BMI) – 0.0306(smoke) + 0.019(alcohol) – 0.347(MnBP) + 0.004(MEP) + 0.515(MBzP)* + 0.079(MnOP) + 0.084(DEHP) + 0.044(BisfenoloA) |  | * <i>p</i> = 0.011                      |
| oxoGuo = 0.779 + 0.006(age) + 0.004(BMI) – 0.157(smoke) – 0.033(alcohol) – 0.076(MnBP) – 0.013(MEP) + 0.219(MBzP) + 0.066(MnOP) + 0.016(DEHP) + 0.061(BisfenoloA)   |  | <i>p</i> > 0.05                         |
| oxodGuo = 0.708 + 0.045(age) – 0.007(BMI) – 0.599(smoke) + 0.047(alcohol) – 0.327(MnBP) – 0.002(MEP) + 0.124(MBzP) + 0.072(MnOP) + 0.194(DEHP) + 0.143(BisfenoloA)  |  | <i>p</i> > 0.05                         |
| NO2Tyr = 1.192 – 0.007(age) – 0.010(BMI) – 0.425(smoke) + 0.118(alcohol) + 0.025(MnBP) – 0.058(MEP) + 0.197(MBzP) + 0.015(MnOP) + 0.136(DEHP) – 0.022(BisfenoloA)   |  | <i>p</i> > 0.05                         |
| MeCyt = 0.994 – 0.013(age) – 0.009(BMI) + 0.066(smoke) – 0.018(alcohol) – 0.087(MnBP) + 0.036(MEP) + 0.226(MBzP)* + 0.045(MnOP) + 0.106(DEHP) + 0.138(BisfenoloA)*  |  | * <i>p</i> = 0.035;<br><i>p</i> = 0.043 |

\*Significant data with the corresponding *p* value

**Table S2.** Concentrations of phthalates and biomarkers of oxidative stress: a comparison of published studies.

| Reference | analytical method                             | subjects                               | Biomarkers of oxidative stress (urine)                 | Urinary phthalate metabolites                                                                                                                                            |
|-----------|-----------------------------------------------|----------------------------------------|--------------------------------------------------------|--------------------------------------------------------------------------------------------------------------------------------------------------------------------------|
| [41]      | ESI-MS/MS <sup>1</sup>                        | 364 pregnant women                     | Median (µg/g creatinine)<br>8-OHdG <sup>2</sup> = 10.7 | Median (µg/g creatinine): MEP <sup>3</sup> = 8.17<br>MBzP <sup>4</sup> = nd,<br>MnBP <sup>5</sup> = 51.8,<br>ΣDEHP <sup>6</sup> = 17.8                                   |
| [43]      | Enzyme immunoassay<br>HPLC-MS/MS <sup>7</sup> | Multiple time points of pregnant women | Median (µg/L)<br>8-OHdG = 130                          | Median (µg/L): MEP = 121, MBzP = 6.38,<br>MnBP = 16.5<br>ΣDEHP = 0.31 µmoli/L                                                                                            |
| [44]      | HPLC/MS/MS ESI-MS/MS                          | 469 couples                            | Median (µg/g creatinine):<br>8-OHdG = 3.13             | Median (µg/g creatinine): MMP <sup>8</sup> = 0.48,<br>MEP = 85.2, MCPP <sup>9</sup> = 4.50, MnBP = 7.66,<br>MiBP = 4.36 MBzP = 3.80, ΣDEHP = 54.8<br>Σ14phthalates = 249 |
| [45]      | ESI-MS/MS                                     | 300 children                           | Median (µg/L):<br>8-OHdG = 2.80                        | Median (µg/L): MEP = 57.3, MBzP = 1.91,<br>ΣDEHP = 110                                                                                                                   |
| [46]      | HPLC/MS/MS                                    | 751 students                           | Geometric means (µg/g creatinine):<br>8-OHdG = 2.02    | Geometric means (µg/g Creatinine): MEP = 31.21<br>MnBP = 35.52<br>MBzP = 1.93<br>MMP = 7.51<br>MiBP <sup>10</sup> = 15.09<br>ΣDEHP = 0.22 µmoli/g creatinine             |
| [52]      | HPLC/MS/MS                                    | 1034 men                               | Median (µg/L):<br>8-OHdG = 8.2                         | Median (µg/L): MEP = 18, MBzP = 2.9,<br>MBP = 63, MnOP <sup>11</sup> = 0.12                                                                                              |

<sup>1</sup>ESI-MS/MS: Electrospray Ionization tandem mass spectrometry; <sup>2</sup>8OHdG: 8-Oxo-2'-desossiguanosina; <sup>3</sup>MEP- monoethyl phthalate; <sup>4</sup>MBzP- monobenzyl phthalate; <sup>5</sup>MnBP- mono-n-butyl phthalate; <sup>6</sup>ΣDEHP- molar sum of the di (ethylhexyl) phthalate metabolites; <sup>7</sup> HPLC-MS/MS: high performance liquid chromatography/tandem mass spectrometry; <sup>8</sup>MMP: Monomethyl phthalate; <sup>9</sup>MCPP: mono-(3-carboxypropyl) phthalate; <sup>10</sup>MiBP: mono isobutylphthalate; <sup>11</sup>MnOP: mono-n-octyl phthalate.
